# Supplementary material for: Prevalence and Virulence Characteristics of Enterococcus faecalis and Enterococcus faecium in Bovine Mastitis Milk Compared to Bovine Normal Raw Milk in South Korea
Source: MDPI journal article supplement (doi:10.3390/ani12111407), 2022-05-30
Supplement: s1 [file s1]

Supplementary data

**Supplementary Table S1.** Polymerase chain reaction primers and product sizes for the detection of *Enterococcus faecalis* and *Enterococcus faecium* virulence genes.

| Gene        | Oligonucleotide Sequence (5' to 3')                          | Product Size (bp) | Annealing Temperature (°C) | Reference |
|-------------|--------------------------------------------------------------|-------------------|----------------------------|-----------|
| <i>esp</i>  | AGA TTT CAT CTT TGA TTC TTG G<br>AAT TGA TTC TTT AGC ATC TGG | 510               | 52                         | [17]      |
| <i>asaI</i> | GCA CGC TAT TAC GAA CTA TGA<br>TAA GAA AGA ACA TCA CCA CGA   | 375               | 56                         |           |
| <i>gelE</i> | TAT GAC AAT GCT TTT TGG GAT<br>AGA TGC ACC CGA AAT AAT ATA   | 213               | 56                         |           |
| <i>cylA</i> | ACT CGG GGA TTG ATA GGC<br>GCT GCT AAA GCT GCG CTT           | 688               | 56                         |           |
